# Supplementary material for: A Portable Nanoporous Gold Modified Screen-Printed Sensor for Reliable and Simultaneous Multi-Vitamins Analysis
Source: MDPI journal article supplement (doi:10.3390/chemosensors11090502), 2023-09-15
Supplement: s1 [file s1]

# A Portable Nanoporous Gold Modified Screen-Printed Sensor for Reliable and Simultaneous Multi-Vitamins Analysis

Xinyu Gao <sup>2</sup>, Siyu Chen <sup>3</sup>, Xiaolei Wang <sup>1</sup>, Honglei Liu <sup>1</sup> and Xia Wang <sup>1,\*</sup>

<sup>1</sup> State Key Laboratory of Microbial Technology, Shandong University, Qingdao 266237, China; 202212540@mail.sdu.edu.cn (X.W.); lhl@sdu.edu.cn (H.L.)

<sup>2</sup> College of Arts & Science, University of North Carolina at Chapel Hill, Chapel Hill, NC 27514, USA; thexinyu@ad.unc.edu

<sup>3</sup> Department of Bioengineering, University of California, Los Angeles, CA 90095, USA; siyuchen23@g.ucla.edu

\* Correspondence: ghwx@sdu.edu.cn; Tel.: +86-13075343592

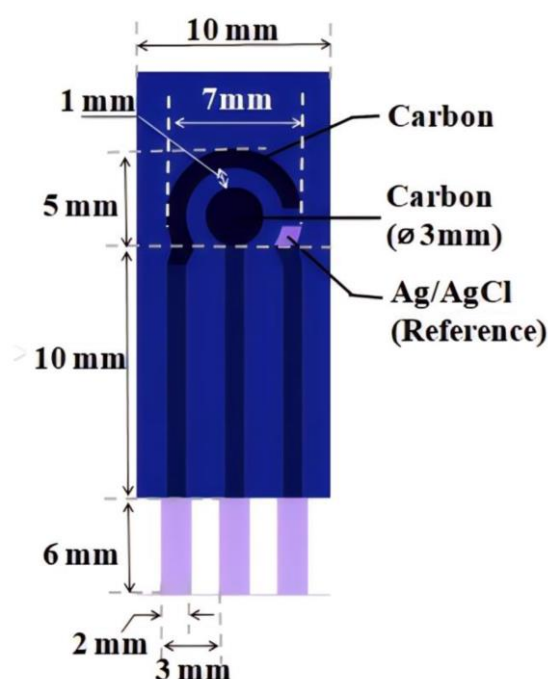

**Figure S1.** The dimensions and electrode materials of the SPE used in this study.

**Table S1.** Performance comparison of electrochemical sensors for VB2 detection.

| Electrode                                                           | Technique | Linear dynamic range ( $\mu\text{M}$ ) | Sensitivity                      | LOD ( $\mu\text{M}$ ) | Refs.     |
|---------------------------------------------------------------------|-----------|----------------------------------------|----------------------------------|-----------------------|-----------|
| $\text{Fe}_3\text{O}_4$ NPs-ePAD (SPE)                              | SWV       | 2–20                                   | $4.87 \mu\text{A}/\mu\text{M}$   | 0.25                  | [1]       |
| $\text{Bi}_2\text{O}_3$ @MWCNT@g-C <sub>3</sub> N <sub>4</sub> /GCE | LSV       | 0.02–70                                | -                                | 1.032                 | [2]       |
| ZnO-MnO/GCE                                                         | DPV       | 0.05–1102                              | $0.3746 \mu\text{A}/\mu\text{M}$ | 0.013                 | [3]       |
| AZA/NiHCF/GCE                                                       | CV        | 4.37–1230                              | $0.1352 \mu\text{A}/\mu\text{M}$ | 1.40                  | [4]       |
| $\alpha\text{-Fe}_2\text{O}_3$ /GCE                                 | SWV       | 1.3–100                                | $0.27 \mu\text{A}/\mu\text{M}$   | 8.4                   | [5]       |
| NPAu/SPE                                                            | DPV       | 5–250                                  | $114.90 \mu\text{A}/\mu\text{M}$ | 0.26                  | This work |

GCE, glass carbon electrode; SPE, screen-printed electrode; NPAu, nanoporous gold; AZA, azure A.

**Table S2.** Performance comparison of electrochemical sensors for VC detection.

| Electrode                                           | Technique | Linear Dynamic Range ( $\mu\text{M}$ ) | Sensitivity                           | LOD ( $\mu\text{M}$ ) | Refs.     |
|-----------------------------------------------------|-----------|----------------------------------------|---------------------------------------|-----------------------|-----------|
| Au-Pd/MXene/LSG/SPE                                 | DPV       | 10–1600                                | -                                     | 3.0                   | [6]       |
| S/NP-Au wire electrode                              | I-T       | 0.3–923.3                              | 39–64 $\mu\text{A}/\mu\text{M}$       | 0.026                 | [7]       |
| $\text{Ce}_2(\text{SO}_4)_3/\text{rGO}/\text{SPCE}$ | DPV       | 10–1000                                | 0.2973 $\mu\text{A}/\mu\text{M cm}^2$ | 900                   | [8]       |
| CFYM/OCPE                                           | DPV       | 9.9–280.5                              | 2.1969 $\mu\text{A}/\mu\text{M cm}^3$ | 5.95                  | [9]       |
| PMR/Zn-Al LDH/GCE                                   | DPV       | 0.10–53.17                             | -                                     | 1.26                  | [10]      |
| NPAu/SPE                                            | DPV       | 5–3000                                 | 15.00 $\mu\text{A}/\mu\text{M}$       | 2.03                  | This work |

NPAu, nanoporous gold; SPE, screen-printed electrode; LSG, laser-scribed graphene; SPCE, screen-printed carbon electrode; CFYM, chicken feet yellow membrane; OCPE, over-oxidized carbon paste electrode; PMR, polymer film of methyl red; Zn-Al LDH, Zn-Al layered double hydroxide.

**Table S3.** Performance comparison of electrochemical sensors for VB6 detection.

| Electrode                                   | Technique | Linear Dynamic Range ( $\mu\text{M}$ ) | Sensitivity                          | LOD ( $\mu\text{M}$ ) | Refs.     |
|---------------------------------------------|-----------|----------------------------------------|--------------------------------------|-----------------------|-----------|
| ZnFe <sub>2</sub> O <sub>4</sub> /SPGE      | DPV       | 0.8–585                                | 0.0501 $\mu\text{A}/\mu\text{M}$     | 0.17                  | [11]      |
| Pencil graphite electrode                   | SWV       | 25–2500                                | 0.13 $\mu\text{A}/\mu\text{M cm}^2$  | 11.0                  | [12]      |
| Fe <sub>3</sub> O <sub>4</sub> NPs-ePAD/SPE | SWV       | 200–2000                               | 0.0214 $\mu\text{A}/\mu\text{M}$     | 29.5                  | [1]       |
| TiO <sub>2</sub> /SnO <sub>2</sub> /GCE     | DPV       | 0.1–31.4                               | 0.759 $\mu\text{A}/\mu\text{M cm}^2$ | 0.035                 | [13]      |
| CuO-PLL/GrE                                 | DPV       | 3–2076                                 | 0.230 $\mu\text{A}/\mu\text{M cm}^2$ | 2.3                   | [14]      |
| NPAu/SPE                                    | DPV       | 5–3000                                 | 20.32 $\mu\text{A}/\mu\text{M}$      | 1.50                  | This work |

SPGE, screen-printed graphite electrode; SPE, screen-printed electrode; GCE, glass carbon electrode; CuO-PLL, CuO-poly(L-lysine); GrE, graphene electrode; NPAu, nanoporous gold.

**Table S4.** Performance comparison of electrochemical sensors for the simultaneous detection of multi-vitamins.

| Electrode                                                | Vitamin | Method | Linear Dynamic Range ( $\mu\text{M}$ ) | LOD ( $\mu\text{M}$ ) | Refs.     |
|----------------------------------------------------------|---------|--------|----------------------------------------|-----------------------|-----------|
| Screen-printed carbon electrode (SPCE)                   | VB2     | SWV    | 1–60                                   | 0.37                  | [15]      |
|                                                          | VC      |        | 10–400                                 | 5.07                  |           |
|                                                          | VB6     |        | 10–400                                 | 3.32                  |           |
| Zn-TiO <sub>2</sub> /GCE                                 | VB2     | DPV    | 2–74                                   | 0.8                   | [16]      |
|                                                          | VC      |        | 7–154                                  | 2.5                   |           |
|                                                          | VB6     |        | 2–74                                   | 0.75                  |           |
| <i>f</i> -MWCNTs-Cu <sub>2</sub> O-Ag <sub>2</sub> O/GCE | VB2     | DPV    | 0.2–865                                | 0.1                   | [17]      |
|                                                          | VC      |        | 0.05–1152                              | 0.075                 |           |
|                                                          | VB6     |        | 0.02–1425                              | 0.052                 |           |
| Ag-PLA/GCE                                               | VB2     | LSV    | 0.1–23                                 | 0.08                  | [18]      |
|                                                          | VC      |        | 5–4000                                 | 3                     |           |
|                                                          | VB6     |        | 10–3000                                | 5                     |           |
| PEDOT/ZrO <sub>2</sub> NPs/GCE                           | VB2     | DPV    | 0.05–300                               | 0.012                 | [19]      |
|                                                          | VC      |        | 0.5–1000                               | 0.2                   |           |
|                                                          | VB6     |        | 1–1500                                 | 0.45                  |           |
| NPAu/SPE                                                 | VB2     | DPV    | 50–250                                 | 0.46                  | This work |
|                                                          | VC      |        | 100–1500                               | 6.44                  |           |
|                                                          | VB6     |        | 50–1100                                | 1.92                  |           |

GCE, glass carbon electrode; MWCNTs, multi-walled carbon nanotubes; Ag-PLA, silver-doped poly(L-arginine); PEDOT, poly(3,4-ethylenedioxythiophene); NPAu, nanoporous gold.

## References

1. Pereira, D.F.; Santana, E.R.; Spinelli, A. Electrochemical paper-based analytical devices containing magnetite nanoparticles for the determination of vitamins B<sub>2</sub> and B<sub>6</sub>. *Microchem. J.* **2022**, *179*, 107588.
2. Kapoor, A.; Pratibha, V.; Rajput, J.K.; Singh, D.; Jigyasa, K.N. Bi<sub>2</sub>O<sub>3</sub>@MWCNT@g-C<sub>3</sub>N<sub>4</sub> ternary nanocomposite for the efficient electrochemical determination of Riboflavin in pharmaceutical samples. *J. Food Compos. Anal.* **2022**, *114*, 104792.
3. Ganesamurthi, J.; Shanmugam, R.; Chen, S.M. Electrochemical evaluation of vitamin B<sub>2</sub> through a portable electrochemical sensor based on binary transition metal oxide in various biological and vegetable samples. *J. Electrochem. Soc.* **2022**, *169*, 096505.
4. Sangeetha, N.S.; Narayanan, S.S. Effective electrochemical detection of riboflavin and butylated hydroxy anisole based on azure A and nickel hexacyanoferrate framework on graphite electrode. *Chem. Data Collect.* **2020**, *30*, 100544.
5. Gribata, L.C.; Babautab, J.T.; Beyenalb, H.; Walla, N.A. New rotating disk hematite film electrode for riboflavin detection. *J. Electroanal. Chem.* **2017**, *798*, 42–50.
6. Wang, Y.; Zhao, P.; Gao, B.; Yuan, M.; Yu, J.; Wang, Z.; Chen, X. Self-reduction of bimetallic nanoparticles on flexible MXene-graphene electrodes for simultaneous detection of ascorbic acid, dopamine, and uric acid. *Microchem. J.* **2023**, *185*, 108177.
7. Chu, Y.; Zhou, H.; Wang, X.; Zhang, H.; Zhao, L.; Xu, T.; Yan, H.; Zhao, F. A flexible and self-supported nanoporous gold wire electrode with a seamless structure for electrochemical ascorbic acid sensor. *Microchem. J.* **2023**, *186*, 108259.
8. Anil Subash, S.; Manjunatha, C.; Sudeep, M.; Chandresh, K.R.; Vishal, C.; Girish, K.S.; Praveen, S. Development of a non-enzymatic vitamin-C electrochemical sensor based on rGO/Ce<sub>2</sub>(SO<sub>4</sub>)<sub>3</sub> hierarchical nanocomposite. *J. Electrochem. Soc.* **2023**, *170*, 037504.
9. Razmi, H.; Bahadori, Y. Chicken feet yellow membrane/over-oxidized carbon paste electrodes: A novel electrochemical platform for determination of vitamin C. *Microchem. J.* **2021**, *168*, 106442.
10. Abo-bakr, A.M.; Abd-Elsabour, M.; Abou-Krishna, M.M. An efficient novel electrochemical sensor for simultaneous determination of vitamin C and aspirin based on a PMR/Zn-Al LDH/GCE. *Electroanalysis* **2021**, *33*, 2476–2489.
11. Jahani, P.M.; Jafari, M.; Ahmadi, S.A. Voltammetric determination of vitamin B<sub>6</sub> in the presence of vitamin C based on zinc ferrite nano-particles modified screen printed graphite electrode. *ADMET DMPK* **2023**, *11*, 251–261.
12. Buleandă, M.; Popa, D.E.; Popa, A.; Codreanu, N.A.M.; Davidz, I.G. Multi-analyte sensor based on pencil graphite electrode for riboflavin and pyridoxine determination. *J. Electrochem. Soc.* **2022**, *169*, 017517.
13. Manoj, D.; Rajendran, S.; Qin, J.; Sundaravadivel, E.; Yola, M.L.; Necip Atar, N.; Gracia, F.; Boukherroub, R.; Gracia-Pinilla, M.A.; Gupta, V.K. Heterostructures of mesoporous TiO<sub>2</sub> and SnO<sub>2</sub> nanocatalyst for improved electrochemical oxidation ability of vitamin B<sub>6</sub> in pharmaceutical tablets. *J. Colloid Interf. Sci.* **2019**, *542*, 45–53.
14. Liu, Y.; Li, M.; Li, H.; Wang, G.; Long, Y.; Li, A.; Yang, B. In situ detection of melatonin and pyridoxine in plants using a CuO-poly(L-lysine)/graphene-based electrochemical sensor. *ACS Sustain. Chem. Eng.* **2019**, *7*, 19537–19545.
15. Yomthiangthae, P.; Takeshi Kondo, T.; Chailapakul, O.; Siangproh, W. The effects of the supporting electrolyte on the simultaneous determination of vitamin B<sub>2</sub>, vitamin B<sub>6</sub>, and vitamin C using a modification-free screen-printed carbon electrode. *New J. Chem.* **2020**, *44*, 12603–12612.
16. Manoj, D.; Rajendran, S.; Gracia, F.; Naushad, M.; Santhamoorthy, M.; Soto-Moscoso, M.; Gracia-Pinilla, M.A. Engineering ZnO nanocrystals anchored on mesoporous TiO<sub>2</sub> for simultaneous detection of vitamins. *Biochem. Eng. J.* **2022**, *186*, 108585.
17. Puangjan, A.; Suwan Chaiyasith, S.; Taweeporngitgul, W.; Keawtep, J. Application of functionalized multi-walled carbon nanotubes supporting cuprous oxide and silver oxide composite catalyst on copper substrate for simultaneous detection of vitamin B<sub>2</sub>, vitamin B<sub>6</sub> and ascorbic acid. *Mater. Sci. Eng. C* **2017**, *76*, 383–397.
18. Liu, G.; Wang, Y.M.; Sun, D.M. Simultaneous determination of vitamins B<sub>2</sub>, B<sub>6</sub> and C using silver-doped poly(L-arginine)-modified glassy carbon electrode. *J. Anal. Chem.* **2016**, *71*, 102–109.
19. Nie, T.; Zhang, K.; Xu, J.; Lu, L.; Bai, L. A facile one-pot strategy for the electrochemical synthesis of poly(3,4-ethylenedioxythiophene)/Zirconia nanocomposite as an effective sensing platform for vitamins B<sub>2</sub>, B<sub>6</sub> and C. *J. Electroanal. Chem.* **2014**, *717–718*, 1–9.
